# Supplementary material
Source: publisher site journal article supplement (https://thieme-connect.com/media/10.1055-s-00035024/201104/supmat/10-1160-th11-05-0364-supp.pdf)
Supplement: Supplementary file 1 [file 10-1160-th11-05-0364-supp.pdf]

Supplementary Material to Olesen et al. “Risks of thromboembolism and bleeding with thromboprophylaxis in patients with atrial fibrillation: A net clinical benefit analysis using a ‘real world’ nationwide cohort study” (Thromb Haemost 2011; 106.4)

Suppl. Figure 1: Hazard ratios of thromboembolism (TE) at 1 year of follow-up. Results from unadjusted time-dependent Cox regression models. ASA: acetylsalicylic acid; CHADS<sub>2</sub> and CHA<sub>2</sub>DS<sub>2</sub>-VASc: see text; VKA: vitamin K antagonist.

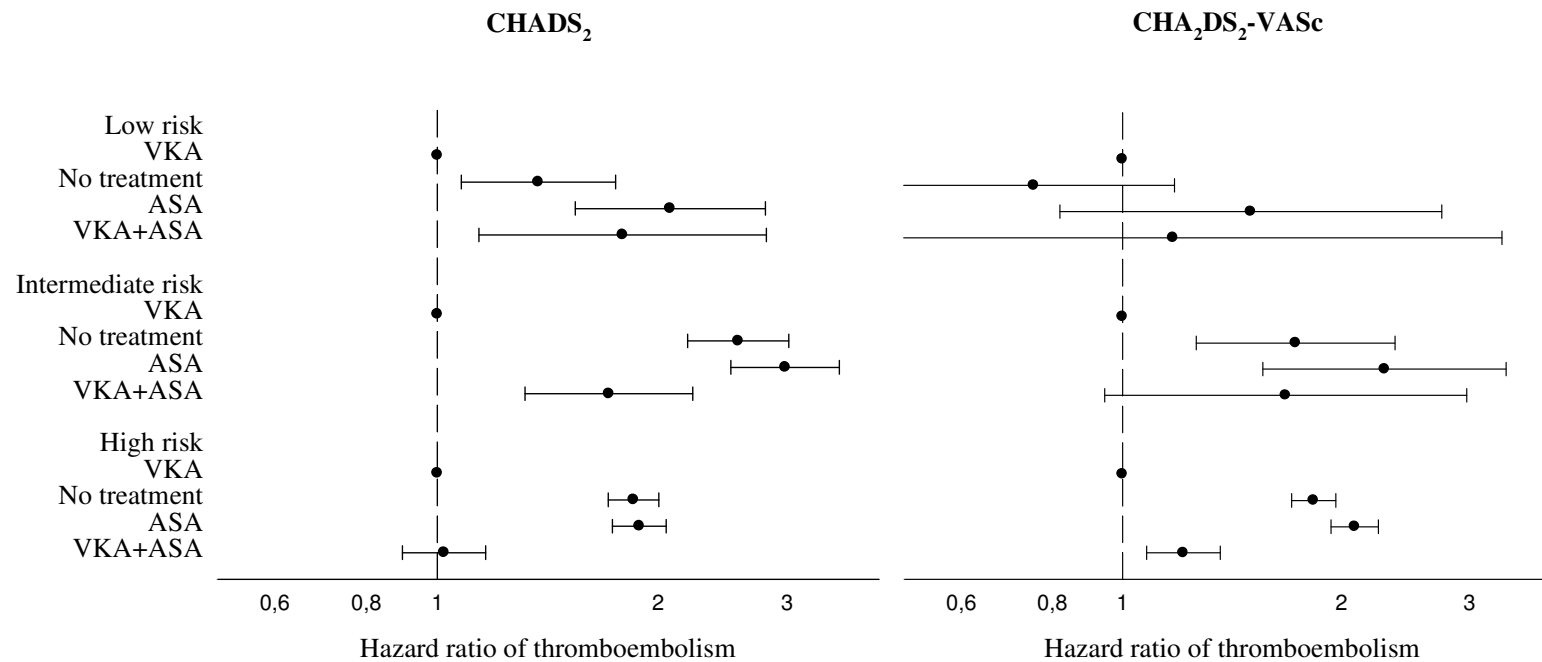

**Suppl. Figure 2: Hazard ratios of bleeding at one year of follow-up. Results from unadjusted time-dependent Cox regression models. ASA: acetylsalicylic acid; CHADS<sub>2</sub> and CHA<sub>2</sub>DS<sub>2</sub>-VASc: see text; VKA: vitamin K antagonist.**

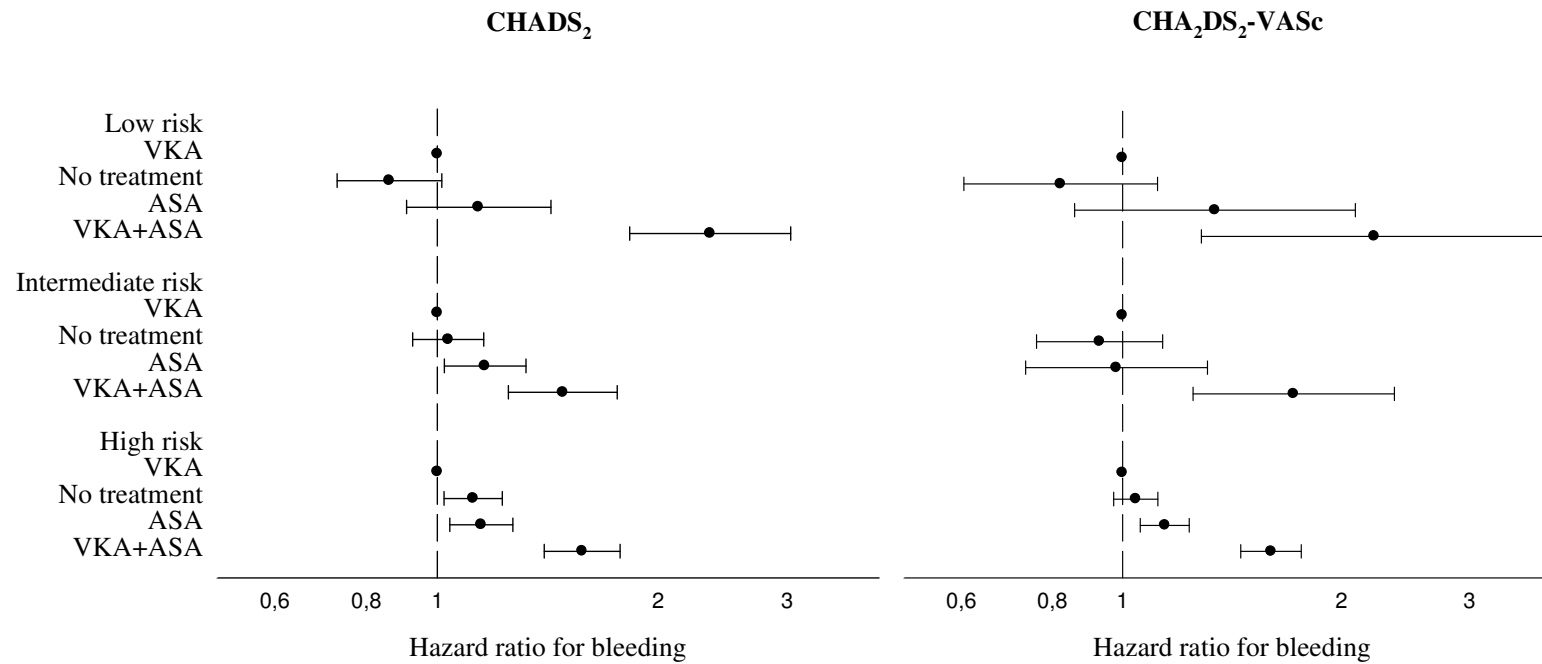

Suppl. Table 1 (a). Rate of thromboembolism per 100 person-years at one year of follow-up (95% confidence interval); according to baseline treatment.

|                                           | Years of follow-up | Thromboembolism events | No treatment            | VKA                     | ASA                     | VKA + ASA               |
|-------------------------------------------|--------------------|------------------------|-------------------------|-------------------------|-------------------------|-------------------------|
| <b>CHADS<sub>2</sub></b>                  |                    |                        |                         |                         |                         |                         |
| Low (score 0)                             | 28,304             | 449                    | 1.67 (1.47-1.91)        | 1.31 (1.09-1.57)        | 2.47 (1.95-3.13)        | 2.44 (1.73-3.43)        |
| Intermediate (1)                          | 37,226             | 1,500                  | 3.37 (3.13-3.63)        | 2.32 (2.06-2.62)        | 5.36 (4.83-5.94)        | 2.90 (2.35-3.59)        |
| High (2-6)                                | 45,696             | 4,663                  | 9.01 (8.67-9.36)        | 6.93 (6.50-7.38)        | 12.78 (12.10-13.49)     | 7.09 (6.41-7.85)        |
| <b>CHA<sub>2</sub>DS<sub>2</sub>-VASc</b> |                    |                        |                         |                         |                         |                         |
| Low (score 0)                             | 11,298             | 104                    | 1.06 (0.81-1.39)        | 1.03 (0.75-1.42)        | 1.36 (0.75-2.45)        | 0.71 (0.23-2.20)        |
| Intermediate (1)                          | 15,866             | 265                    | 1.62 (1.37-1.92)        | 1.28 (1.02-1.61)        | 2.73 (2.04-3.64)        | 1.67 (1.04-2.68)        |
| High (2-9)                                | 84,062             | 6,243                  | 6.77 (6.54-7.00)        | 4.97 (4.70-5.26)        | 9.77 (9.31-10.24)       | 5.83 (5.33-6.38)        |
| <b>Total</b>                              | <b>111,226</b>     | <b>6,612</b>           | <b>5.63 (5.45-5.82)</b> | <b>3.92 (3.71-4.14)</b> | <b>8.81 (8.41-9.24)</b> | <b>5.16 (4.72-5.64)</b> |

ASA: acetylsalicylic acid; CHADS<sub>2</sub>: see text; CHA<sub>2</sub>DS<sub>2</sub>-VASc: see text; VKA: vitamin K antagonist

(b). Rate of thromboembolism per 100 person-years at one year of follow-up (95% confidence interval); patients were excluded when they discontinued or changed baseline treatment.

|                                           | Years of follow-up | Thromboembolism events | No treatment       | VKA              | ASA                 | VKA + ASA        |
|-------------------------------------------|--------------------|------------------------|--------------------|------------------|---------------------|------------------|
| <b>CHADS<sub>2</sub></b>                  |                    |                        |                    |                  |                     |                  |
| Low (score 0)                             | 22,015             | 332                    | 1.63 (1.40-1.91)   | 1.32 (1.07-1.63) | 2.19 (1.64-2.93)    | 2.50 (1.69-3.69) |
| Intermediate (1)                          | 27,616             | 1,192                  | 3.60 (1.31-3.92)   | 2.40 (2.09-2.76) | 5.71 (5.09-6.41)    | 3.18 (2.49-4.05) |
| High (2-6)                                | 33,113             | 3,774                  | 10.14 (9.72-10.57) | 7.71 (7.17-8.28) | 14.09 (13.29-14.94) | 8.03 (7.17-8.99) |
| <b>CHA<sub>2</sub>DS<sub>2</sub>-VASc</b> |                    |                        |                    |                  |                     |                  |
| Low (score 0)                             | 9,095              | 74                     | 1.08 (0.80-1.48)   | 1.16 (0.82-1.64) | 0.81 (0.34-1.95)    | 0.95 (0.31-2.95) |
| Intermediate (1)                          | 12,092             | 186                    | 1.45 (1.18-1.78)   | 1.21 (0.92-1.59) | 2.29 (1.59-3.30)    | 1.35 (0.73-2.51) |
| High (2-9)                                | 61,558             | 5,038                  | 7.56 (7.28-7.84)   | 5.44 (5.11-5.80) | 10.75 (10.21-11.33) | 6.58 (5.95-7.28) |
| Total                                     | 82,745             | 5,298                  | 6.22 (6.00-6.45)   | 4.22 (3.97-4.49) | 9.64 (9.16-10.15)   | 5.75 (5.21-6.35) |

ASA: acetylsalicylic acid; CHADS<sub>2</sub>: see text; CHA<sub>2</sub>DS<sub>2</sub>-VASc: see text; VKA: vitamin K antagonist

(c). Hazard ratios of thromboembolism at one year of follow-up; according to baseline treatment.

|                                           | No treatment     | VKA       | ASA              | VKA + ASA        |
|-------------------------------------------|------------------|-----------|------------------|------------------|
| <b>CHADS<sub>2</sub></b>                  |                  |           |                  |                  |
| Low (score 0)                             | 1.15 (0.92-1.44) | Reference | 1.88 (1.40-2.54) | 1.86 (1.27-2.74) |
| Intermediate (1)                          | 2.07 (1.80-2.38) | Reference | 2.28 (1.94-2.67) | 1.25 (0.98-1.59) |
| High (2-6)                                | 1.74 (1.61-1.88) | Reference | 1.79 (1.65-1.95) | 1.02 (0.90-1.15) |
| <b>CHA<sub>2</sub>DS<sub>2</sub>-VASc</b> |                  |           |                  |                  |
| Low (score 0)                             | 0.79 (0.52-1.20) | Reference | 1.31 (0.67-2.55) | 0.69 (0.21-2.23) |
| Intermediate (1)                          | 1.34 (1.01-1.79) | Reference | 2.12 (1.47-3.07) | 1.30 (0.77-2.20) |
| High (2-9)                                | 1.65 (1.55-1.77) | Reference | 1.92 (1.78-2.06) | 1.16 (1.05-1.29) |

Results from Cox regression analysis. ASA: acetylsalicylic acid; CHADS<sub>2</sub>: see text; CHA<sub>2</sub>DS<sub>2</sub>-VASc: see text; VKA: vitamin K antagonist

Suppl. Table 2 (a). Rate of bleeding per 100 person-years at one year of follow-up (95% confidence interval); according to baseline treatment.

|                                           | Years of follow-up | Bleeding events | No treatment            | VKA                     | ASA                     | VKA + ASA               |
|-------------------------------------------|--------------------|-----------------|-------------------------|-------------------------|-------------------------|-------------------------|
| <b>CHADS<sub>2</sub></b>                  |                    |                 |                         |                         |                         |                         |
| Low (score 0)                             | 28,087             | 804             | 3.15 (2.86-3.47)        | 2.69 (2.37-3.06)        | 3.65 (3.01-4.44)        | 5.11 (4.03-6.48)        |
| Intermediate (1)                          | 36,888             | 1,953           | 5.17 (4.87-5.49)        | 4.55 (4.17-4.96)        | 5.77 (5.21-6.38)        | 6.20 (5.35-7.18)        |
| High (2-6)                                | 45,910             | 3,126           | 6.72 (6.43-7.03)        | 5.91 (5.51-6.33)        | 6.95 (6.46-7.47)        | 8.42 (7.67-9.25)        |
| <b>CHA<sub>2</sub>DS<sub>2</sub>-VASc</b> |                    |                 |                         |                         |                         |                         |
| Low (score 0)                             | 11,223             | 222             | 2.19 (1.81-2.65)        | 1.91 (1.51-2.42)        | 2.87 (1.91-4.32)        | 3.37 (1.99-5.68)        |
| Intermediate (1)                          | 15,729             | 512             | 3.27 (2.91-3.69)        | 2.95 (2.53-3.43)        | 3.47 (2.68-4.49)        | 4.78 (3.60-6.35)        |
| High (2-9)                                | 83,934             | 5,149           | 6.18 (5.96-6.40)        | 5.41 (5.13-5.71)        | 6.49 (6.12-6.89)        | 7.80 (7.21-8.43)        |
| <b>Total</b>                              | <b>110,885</b>     | <b>5,883</b>    | <b>5.48 (5.30-5.67)</b> | <b>4.62 (4.39-4.85)</b> | <b>6.09 (5.75-6.44)</b> | <b>7.28 (6.76-7.85)</b> |

ASA: acetylsalicylic acid; CHADS<sub>2</sub>: see text; CHA<sub>2</sub>DS<sub>2</sub>-VASc: see text; VKA: vitamin K antagonist

(b). Rate of bleeding per 100 person-years at one year of follow-up (95% confidence interval); patients were excluded when they discontinued or changed baseline treatment.

|                                           | Years of follow-up | Bleeding events | No treatment     | VKA              | ASA              | VKA + ASA         |
|-------------------------------------------|--------------------|-----------------|------------------|------------------|------------------|-------------------|
| <b>CHADS<sub>2</sub></b>                  |                    |                 |                  |                  |                  |                   |
| Low (score 0)                             | 21,846             | 612             | 3.18 (2.84-3.56) | 2.72 (2.35-3.16) | 3.47 (2.75-4.37) | 5.59 (4.29-7.28)  |
| Intermediate (1)                          | 27,332             | 1,481           | 5.45 (5.09-5.84) | 4.80 (4.35-5.31) | 6.05 (5.41-6.78) | 6.52 (5.49-7.73)  |
| High (2-6)                                | 33,146             | 2,352           | 7.14 (6.79-7.50) | 6.28 (5.80-6.80) | 7.25 (6.68-7.86) | 9.15 (8.22-10.18) |
| <b>CHA<sub>2</sub>DS<sub>2</sub>-VASc</b> |                    |                 |                  |                  |                  |                   |
| Low (score 0)                             | 9,033              | 170             | 2.24 (1.80-2.78) | 1.86 (1.41-2.45) | 2.79 (1.74-4.49) | 4.53 (2.68-7.64)  |
| Intermediate (1)                          | 11,984             | 378             | 3.26 (2.84-3.75) | 2.95 (2.47-3.52) | 3.68 (2.75-4.91) | 4.38 (3.10-6.19)  |
| High (2-9)                                | 61,307             | 3,897           | 6.55 (6.29-6.82) | 5.77 (5.42-6.14) | 6.75 (6.32-7.21) | 8.46 (7.74-9.26)  |
| Total                                     | 82,324             | 4,445           | 5.77 (5.55-5.99) | 4.84 (4.57-5.12) | 6.33 (5.95-6.75) | 7.84 (7.19-8.54)  |

ASA: acetylsalicylic acid; CHADS<sub>2</sub>: see text; CHA<sub>2</sub>DS<sub>2</sub>-VASc: see text; VKA: vitamin K antagonist

(c). Hazard ratios of bleeding at one year of follow-up; according to baseline treatment.

|                                           | No treatment     | VKA       | ASA              | VKA + ASA        |
|-------------------------------------------|------------------|-----------|------------------|------------------|
| <b>CHADS<sub>2</sub></b>                  |                  |           |                  |                  |
| Low (score 0)                             | 0.97 (0.82-1.13) | Reference | 1.34 (1.06-1.69) | 1.88 (1.44-2.46) |
| Intermediate (1)                          | 1.18 (1.06-1.32) | Reference | 1.25 (1.09-1.42) | 1.35 (1.14-1.61) |
| High (2-6)                                | 1.16 (1.06-1.27) | Reference | 1.15 (1.04-1.27) | 1.42 (1.26-1.59) |
| <b>CHA<sub>2</sub>DS<sub>2</sub>-VASc</b> |                  |           |                  |                  |
| Low (score 0)                             | 0.94 (0.70-1.27) | Reference | 1.48 (0.92-2.36) | 1.75 (0.99-3.11) |
| Intermediate (1)                          | 1.09 (0.89-1.33) | Reference | 1.16 (0.86-1.57) | 1.61 (1.17-2.22) |
| High (2-9)                                | 1.11 (1.03-1.19) | Reference | 1.18 (1.09-1.27) | 1.43 (1.30-1.57) |

Results from Cox regression analysis. ASA: acetylsalicylic acid; CHADS<sub>2</sub>: see text; CHA<sub>2</sub>DS<sub>2</sub>-VASc: see text; VKA: vitamin K antagonist
